# Supplementary material for: Internal and marginal fit of digitally fabricated all-ceramic crowns with auxiliary retentive features on short clinical abutments: a micro-CT study
Source: PeerJ. 2025 Aug 25;13:e19813. doi: 10.7717/peerj.19813 (PMC12393077; doi:10.7717/peerj.19813)
Supplement: Supplemental Information 1 [file peerj-13-19813-s001.xlsx]

## Sheet: Sheet1
	Group	distance between the crown and tooth 2D assessment (uM)							distance between the crown groove and tooth			3D cement volume measurements
		MARGIN	AXIAL	OCCLUSAL			AXIAL	MARGIN				IN mm3
		Area 1	Area 2	Area 3	Area 4	Area 5	Area 6	Area 7	1G	2G	3G	VOL
C-W/OG	A1	119.129	61.23	154.23	104.53	161.02	67.44	116.147	0	0	0	22.12
	A2	101.23	41.23	167.89	139.21	163.45	51.23	119.129	0	0	0	18.89
	A3	129.34	61.23	178.12	110.53	165.87	65.23	120.184	0	0	0	19.45
	A4	109.37	81.23	185.76	113.53	168.29	71.23	118.074	0	0	0	21.01
	A5	109.34	41.98	193.34	116.53	170.71	46.98	105.56	0	0	0	17.68
	A6	98.98	67.23	154.87	137.29	173.13	77.23	88.98	0	0	0	28.23
	A7	94.33	89.32	172.45	122.53	175.55	89.32	84.33	0	0	0	16.32
	A8	98.22	72.54	180.67	125.53	166.23	76.54	97.22	0	0	0	23.56
	A9	98.12	78.56	187.89	128.53	180.39	74.56	98.12	0	0	0	20.78
	A10	96.34	77.54	195.56	131.53	182.81	77.54	94.34	0	0	0	25.09
	A11	83.22	46.98	177.67	134.53	185.23	46.54	83.24	0	0	0	19.87
	A12	81.33	63.22	174.78	137.53	187.65	65.77	81.33	0	0	0	24.34
	A13	98.45	85.43	182.34	140.53	190.07	78.44	99.45	0	0	0	17.92
	A14	111.12	57.44	176.56	143.53	161.75	57.44	119.12	0	0	0	26.67
	A15	67.44	62.45	197.12	146.53	194.91	52.45	67.44	0	0	0	18.45
	A16	56.12	76.12	168.56	121.34	197.33	96.12	78.17	0	0	0	22.12
	A17	87.33	79.22	176.23	127.39	199.75	75.22	87.33	0	0	0	17.79
	A18	102.33	63.44	183.89	129.31	202.17	72.44	99.33	0	0	0	21.01
	A19	107.38	61.22	191.43	111.23	166.11	61.19	103.38	0	0	0	19.56
	A20	101.98	42.34	151.78	108.44	207.01	41.34	121.98	0	0	0	23.23
	A21	65.41	77.34	170.34	119.34	209.43	77.25	65.41	0	0	0	16.9
	A22	69.32	74.33	177.67	117.87	171.23	74.33	71.32	0	0	0	20.12
	A23	103.74	74.98	185.12	115.32	214.27	72.98	102.79	0	0	0	27.67
	A24	92.19	61.29	192.78	112.45	167.91	61.21	90.39	0	0	0	18.34
	A25	93.09	62.45	167.45	110.43	176.32	61.43	93.09	0	0	0	22.01
	A26	67.32	63.11	171.78	109.43	174.21	63.11	67.32	0	0	0	17.68
	A27	112.65	61.87	179.23	131.24	167.22	61.87	102.65	0	0	0	21.9
	A28	91.29	59.32	186.56	121.45	162.23	52.32	91.29	0	0	0	19.45
	A29	69.45	51.98	194.12	132.22	167.29	51.98	88.34	0	0	0	24.12
	A30	77.34	42.45	154.98	133.29	168.11	40.45	98.13	0	0	0	16.79
	AVERAGE	93.0966	64.6357	177.706	124.438	179.255	65.3727	95.1195	0	0	0	20.969
ZR+G	B1	130.34	100.32	181.33	185.11	195.34	100.57	129.34	118.12	199.12	189.12	21.66
	B2	134.87	91.22	192.76	180.34	190.21	91.47	128.33	100.89	181.89	171.89	22.89
	B3	131.27	102.76	203.54	182.56	191.87	105.99	126.33	102.45	183.45	173.45	23.45
	B4	129.42	103.67	194.32	216.78	216.45	98.92	130.44	115.01	196.01	186.01	25.01
	B5	133.67	104.61	181.22	199.89	189.56	104.88	125.91	97.68	178.68	168.68	21.68
	B6	135.66	105.54	176.89	204.67	194.78	101.79	131.54	108.23	189.23	179.23	19.92
	B7	128.97	106.63	207.87	212.12	192.33	119.88	124.93	96.32	198.88	167.32	20.32
	B8	136.76	131.22	198.28	227.34	217.12	128.47	132.94	109.56	190.56	180.56	19.92
	B9	132.56	98.32	180.91	198.45	188.67	94.57	123.75	100.78	181.78	171.78	24.78
	B10	137.05	95.55	191.14	183.56	203.89	91.78	133.45	112.09	193.09	183.09	29.09
	B11	126.09	100.65	177.66	220.67	190.44	90.9	122.55	94.87	175.87	165.87	21.87
	B12	138.02	131.33	202.34	205.78	215.23	121.58	134.32	107.34	188.34	178.34	18.67
	B13	127.01	102.87	213.12	181.89	211.98	112.64	121.41	112.73	198.77	161.92	19.92
	B14	139.05	103.87	204.34	195.23	196.76	113.64	135.91	115.67	197.67	187.67	19.92
	B15	125.55	104.43	215.27	183.34	189.01	97.2	120.98	97.45	179.45	169.45	18.77
	B16	140.12	105.69	206.26	191.45	184.23	125.46	136.94	108.12	190.12	180.12	19.65
	B17	124.67	106.91	177.66	194.56	192.88	136.68	119.93	111.76	173.79	163.79	20.79
	B18	141.76	107.73	181.21	187.67	217.67	127.5	137.91	103.01	185.01	175.01	24.01
	B19	123.06	132.22	179.67	201.44	188.22	112.22	118.31	112.81	176.56	166.56	22.56
	B20	142.99	109.94	210.76	173.89	193.54	130.21	138.37	106.23	188.23	178.23	27.23
	B21	122.17	100.87	221.32	197.23	190.09	131.13	132.54	116.99	187.99	161.9	19.9
	B22	143.92	94.22	198.77	185.34	195.78	124.48	139.76	101.12	183.12	173.12	23.12
	B23	121.34	89.33	173.54	201.45	192.43	139.59	116.44	112.67	194.67	184.67	19.92
	B24	144.77	98.44	214.77	197.56	217.22	118.7	140.92	95.34	177.34	167.34	21.34
	B25	120.67	92.12	225.88	198.67	188.77	92.38	115.64	107.01	189.01	179.01	18.65
	B26	145.78	105.52	178.99	183.78	193.98	105.78	141.71	90.68	172.68	162.68	20.68
	B27	119.56	106.51	175.55	170.89	190.53	106.77	114.45	102.9	184.9	174.9	24.9
	B28	146.34	95.21	218.19	185.12	205.32	115.47	142.51	114.77	193.76	165.45	22.45
	B29	118.03	92.72	171.55	181.23	191.07	92.98	113.37	105.12	187.12	177.12	18.51
	B30	147.29	109.38	193.16	206.34	196.86	109.64	143.57	101.33	197.72	160.79	19.79
	AVERAGE	132.959	104.327	194.942	194.478	197.408	111.442	129.15	105.968	187.16	173.502	21.7123
EMAX+G	C1	118.55	88	173.23	163.11	183.45	88.01	118.57	100.12	163.12	144.12	18.71
	C2	119.32	76.99	188.23	164.22	178.67	89.02	129.34	82.89	144.89	126.89	20.89
	C3	119.32	77	178.23	166.33	198.89	71.03	109.36	84.45	146.45	128.45	21.45
	C4	122.32	92.11	198.25	167.44	178.01	92.04	122.38	97.01	159.01	141.01	23.01
	C5	103.11	93	188.23	168.55	168.23	93.05	133.13	80.68	142.68	123.68	19.68
	C6	123.11	81.81	195.21	169.66	185.65	94.06	123.13	91.23	153.23	134.23	18.49
	C7	123.11	91.11	177.39	170.77	177.77	95.07	113.15	79.32	141.32	122.32	18.32
	C8	126.55	88.76	179.23	166.23	179.89	91.08	116.57	92.56	154.56	135.56	25.56
	C9	127.43	94.93	187.43	161.26	197.01	97.09	107.45	83.78	145.78	126.78	22.78
	C10	128.98	76.51	178.23	162.34	208.34	89.1	118.96	95.09	157.09	138.09	27.09
	C11	129.76	83.22	198.21	176.34	218.56	99.11	119.74	77.87	139.87	144.76	19.87
	C12	100.65	121	181.23	161.99	179.23	89.12	100.67	90.34	152.34	133.34	26.34
	C13	131.54	91.84	198.21	153.27	200.12	101.13	91.56	73.92	161.88	143.74	17.92
	C14	132.65	77.91	181.36	159.12	188.56	92.14	122.63	98.67	160.67	141.67	18.27
	C15	133.32	81.33	201	178.65	178.01	83.15	123.3	80.45	142.45	123.45	20.45
	C16	134.65	75.45	199.23	179.76	175.34	94.16	124.63	91.12	153.12	134.12	24.12
	C17	105.98	87.13	201.23	163.26	178.78	95.17	115.96	104.78	136.79	142.82	19.79
	C18	136.32	106	179.45	166.23	171.56	96.18	132.22	106.98	148.01	129.01	23.01
	C19	137.43	80.94	200.25	167.23	178.45	87.19	127.41	102.56	139.56	120.56	21.56
	C20	108.65	108	188.34	167.22	181.78	108.2	118.63	103.66	151.23	132.23	25.23
	C21	119.65	75.44	178.27	171.25	171.22	89.21	109.63	101.23	162.96	142.99	18.9
	C22	120.21	110	185.45	167.23	171.12	98.32	110.19	84.12	146.12	127.12	22.12
	C23	120.21	82.37	198.12	176.12	201.45	87.33	110.23	95.67	157.67	138.67	29.67
	C24	102.91	76.87	171.34	177.29	199.67	92.24	102.93	78.34	140.34	121.34	20.34
	C25	103.98	113	198.23	189.75	171.89	78.33	93.96	90.01	152.01	133.01	24.01
	C26	114.33	87.55	212	155.24	210.12	79.21	104.31	73.68	135.68	116.68	19.68
	C27	105.33	115	213	157.93	211.34	108.35	115.31	85.9	147.9	128.9	23.9
	C28	105.33	98.88	174.34	165.57	187.78	99.21	135.35	76.45	138.45	119.45	21.45
	C29	137.67	117	176.39	153.37	198.56	117.29	137.65	88.12	150.12	131.12	26.12
	C30	128.67	75.43	181.43	195.3	178.21	71.23	128.65	71.79	133.79	141.76	18.79
	AVERAGE	120.701	90.8193	188.691	168.068	186.922	92.194	117.233	88.7597	148.636	132.262	21.9173
CON EMAX+G	D1	181.45	133.58	108.71	121.34	101.34	154.87	229.56	147.12	254.12	181.12	20.71
	D2	183.67	135.58	125.12	128.45	118.45	157.23	211.56	128.89	236.89	162.89	23.89
	D3	185.89	137.58	108.77	130.78	110.78	160.56	213.56	130.45	238.45	164.45	21,64
	D4	188.11	139.58	112.67	136.12	126.12	163.89	215.56	143.01	251.01	177.01	21.41
	D5	190.33	141.58	119.99	134.21	114.21	167.22	237.56	126.68	234.68	160.68	22.68
	D6	192.55	143.58	118.23	126.89	106.89	170.55	219.56	137.23	245.23	171.23	21.89
	D7	194.77	145.58	87.89	123.76	103.76	173.88	221.56	125.32	233.32	159.32	21.32
	D8	196.99	147.58	99.78	132.98	102.98	177.21	223.56	138.56	246.56	172.56	21.12
	D9	199.21	149.58	101.22	129.01	119.01	176.88	225.56	129.78	237.78	163.78	25.78
	D10	201.43	151.58	111.45	135.67	115.67	185.43	227.56	141.09	249.09	175.09	21.29
	D11	203.65	153.58	109.78	127.43	107.43	187.2	229.56	123.87	231.87	157.87	22.87
	D12	205.87	155.58	108.01	131.79	121.79	180.53	231.56	136.34	244.34	170.34	29.34
	D13	208.09	157.58	106.34	125.56	115.56	181.87	233.56	119.92	243.83	153.92	20.92
	D14	209.45	159.58	104.67	138.9	108.9	165.56	235.56	142.67	252.67	178.67	21.57
	D15	189.34	161.58	102.99	133.34	99.87	156.87	237.56	124.45	234.45	160.45	23.45
	D16	176.45	163.58	101.22	124.67	98.76	169.99	239.56	135.12	245.12	171.12	27.12
	D17	187.32	165.58	99.45	137.23	87.98	172.87	229.43	118.79	265.88	154.79	21.79
	D18	178.32	167.58	97.78	122.12	121.98	156.66	232.54	130.01	261.87	166.01	25.01
	D19	198.38	145.88	115.78	139.78	131.87	159.99	219.45	121.56	231.56	157.56	23.56
	D20	203.54	156.89	115.87	130.41	123.74	157.67	215.41	133.23	243.23	169.23	21.33
	D21	206.43	147.81	121.67	136.45	106.87	185.77	229.44	142.76	259.98	152.9	20.9
	D22	204.34	157.98	90.99	123.89	103.73	163.66	221.56	128.12	258.76	164.12	24.12
	D23	212.23	134.86	123.61	129.67	127.87	158.81	223.56	139.67	249.67	175.67	21.44
	D24	198.34	143.87	87.55	131.23	131.23	187.43	225.56	122.34	232.34	158.34	22.34
	D25	187.47	155.87	109.78	135.12	120.85	158.87	237.56	134.01	244.01	170.01	26.01
	D26	205.45	139.91	119.82	127.9	127.9	165.78	239.56	117.68	227.68	153.68	21.68
	D27	212.76	138.87	82.44	133.56	133.56	182.76	231.56	129.9	239.9	165.9	25.9
	D28	214.56	166.89	116.56	126.34	126.34	176.77	223.56	120.45	230.45	156.45	20.13
	D29	203.456	134.57	114.89	137.33	109.23	159.97	215.56	132.12	242.12	168.12	21.79
	D30	201.23	167.83	113.12	128.78	128.78	164.76	217.56	143.98	255.87	151.79	20.79
	AVERAGE	197.369	150.056	107.872	130.69	115.115	169.384	226.509	131.504	244.091	164.836	22.8328
